# Supplementary material
Source: publisher figshare collection journal article supplement (https://acs.figshare.com/ndownloader/files/5070607)
Supplement: Supplementary file 1 [file 5070607]

## 240 GHz TR-EPR spectra calculated for different degrees of molecular biaxiality.

In Figure 1 we report calculated spectra at 240GHz, obtained considering the director  $\mathbf{n}$  parallel to the  $Z_{ZFS}$  axis,  $\epsilon=2$  and increasing values of the biaxiality parameter  $\lambda$ . Spectra a-c correspond to the director parallel to the magnetic field, while for spectra d-f the director is perpendicular to the magnetic field. The spectra in Figure 1a,d refer to uniaxial distribution,  $\lambda=0.0$ ; in Figure 1b,e to biaxial distribution with  $\lambda=0.7$ ; in Figure 1c,f the same as before but with a negative value of the biaxiality parameter  $\lambda=-0.7$ . The biaxiality determines the relative intensity of the spectral features corresponding to the tensor components less aligned to the director, in this case  $X_{ZFS}$  and  $Y_{ZFS}$ . Changing the sign of  $\lambda$  is equivalent to exchanging the X and Y axes in the molecular frame.

| Table 1: values of the Saupe tensor for the spectra in figure 1 |            |           |                |                |                |
|-----------------------------------------------------------------|------------|-----------|----------------|----------------|----------------|
| Spectrum                                                        | $\epsilon$ | $\lambda$ | $S_{XX}^{ZFS}$ | $S_{YY}^{ZFS}$ | $S_{ZZ}^{ZFS}$ |
| a), d)                                                          | 2.0        | 0.0       | -0.22          | -0.22          | 0.44           |
| b), e)                                                          | 2.0        | 0.7       | -0.02          | -0.33          | 0.35           |
| c), f)                                                          | 2.0        | -0.7      | -0.33          | -0.02          | 0.35           |

Parameters for the simulation:  $D = 554 \text{ MHz}$ ,  $E = 38 \text{ MHz}$ ,  $g_{xx} = 2.00105$ ,  $g_{yy} = 2.00160$ ,  $g_{zz} = 2.00215$ ,  $p_x = 0.93$ ,  $p_y = 0.07$ ,  $p_z = 0.00$ ,  $\Omega_g = \Omega_{ZFS} = (0^\circ, 0^\circ, 0^\circ)$  [see Scheme 2 of the article].

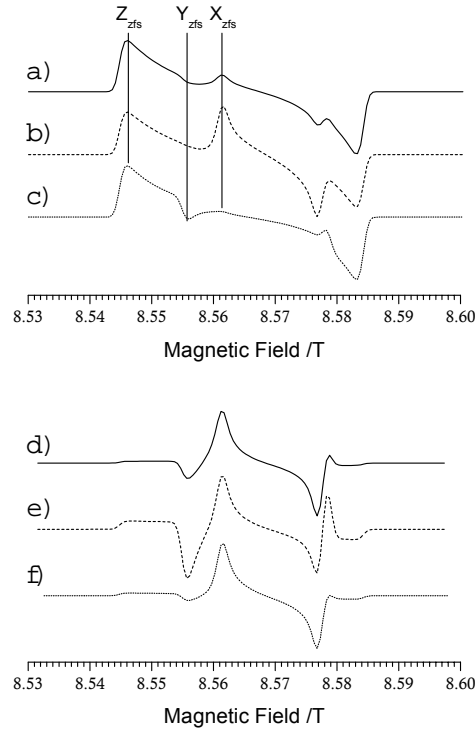

Fig.1. Calculated TR-EPR spectra at 240GHz, with  $\epsilon=2$  and different values of  $\lambda$ , see table 1. Spectra a-c correspond to  $B_0$  parallel to the director, spectra d-f to  $B_0$  perpendicular to the director.
